# Supplementary material
Source: PubMed Central journal article supplement (PMC3605812)
Supplement: cn300196n_si_001.pdf [file cn300196n_si_001.pdf]

## Supporting Information

# Influence of the Physiochemical Properties of Superparamagnetic Iron Oxide Nanoparticles on Amyloid $\beta$ Protein Fibrillation in solution

Morteza Mahmoudi<sup>1,2\*</sup>, Fiona Quinlan-Pluck<sup>3</sup>, Marco P. Monopoli<sup>3</sup>, Sara Sheibani<sup>4</sup>,  
Hojatollah Vali<sup>5</sup>, Kenneth A. Dawson<sup>3</sup>, and Iseult Lynch<sup>3\*</sup>

<sup>1</sup>Department of Nanotechnology, Faculty of Pharmacy, Tehran University of Medical Sciences, Tehran, Iran.

<sup>2</sup>Nanotechnology Research Centre, Faculty of Pharmacy, Tehran University of Medical Sciences, Tehran, Iran.

<sup>3</sup>Centre for BioNano Interactions, School of Chemistry and Chemical Biology, University College Dublin, Belfield, Dublin 4, Ireland

<sup>4</sup>Department of Chemistry and Chemical Engineering, Royal Military College, Kingston, Ontario K7K 7B4, Canada

<sup>5</sup>Department of Anatomy and Cell Biology, McGill University, Montreal, Canada

\*Corresponding Authors

(M.M.) Web: [www.biospion.com](http://www.biospion.com); e-mail: [Mahmoudi@tums.ac.ir](mailto:Mahmoudi@tums.ac.ir); (I.L.) e-mail:

[Iseult.Lynch@cbni.ucd.ie](mailto:Iseult.Lynch@cbni.ucd.ie)

## Supporting Figures

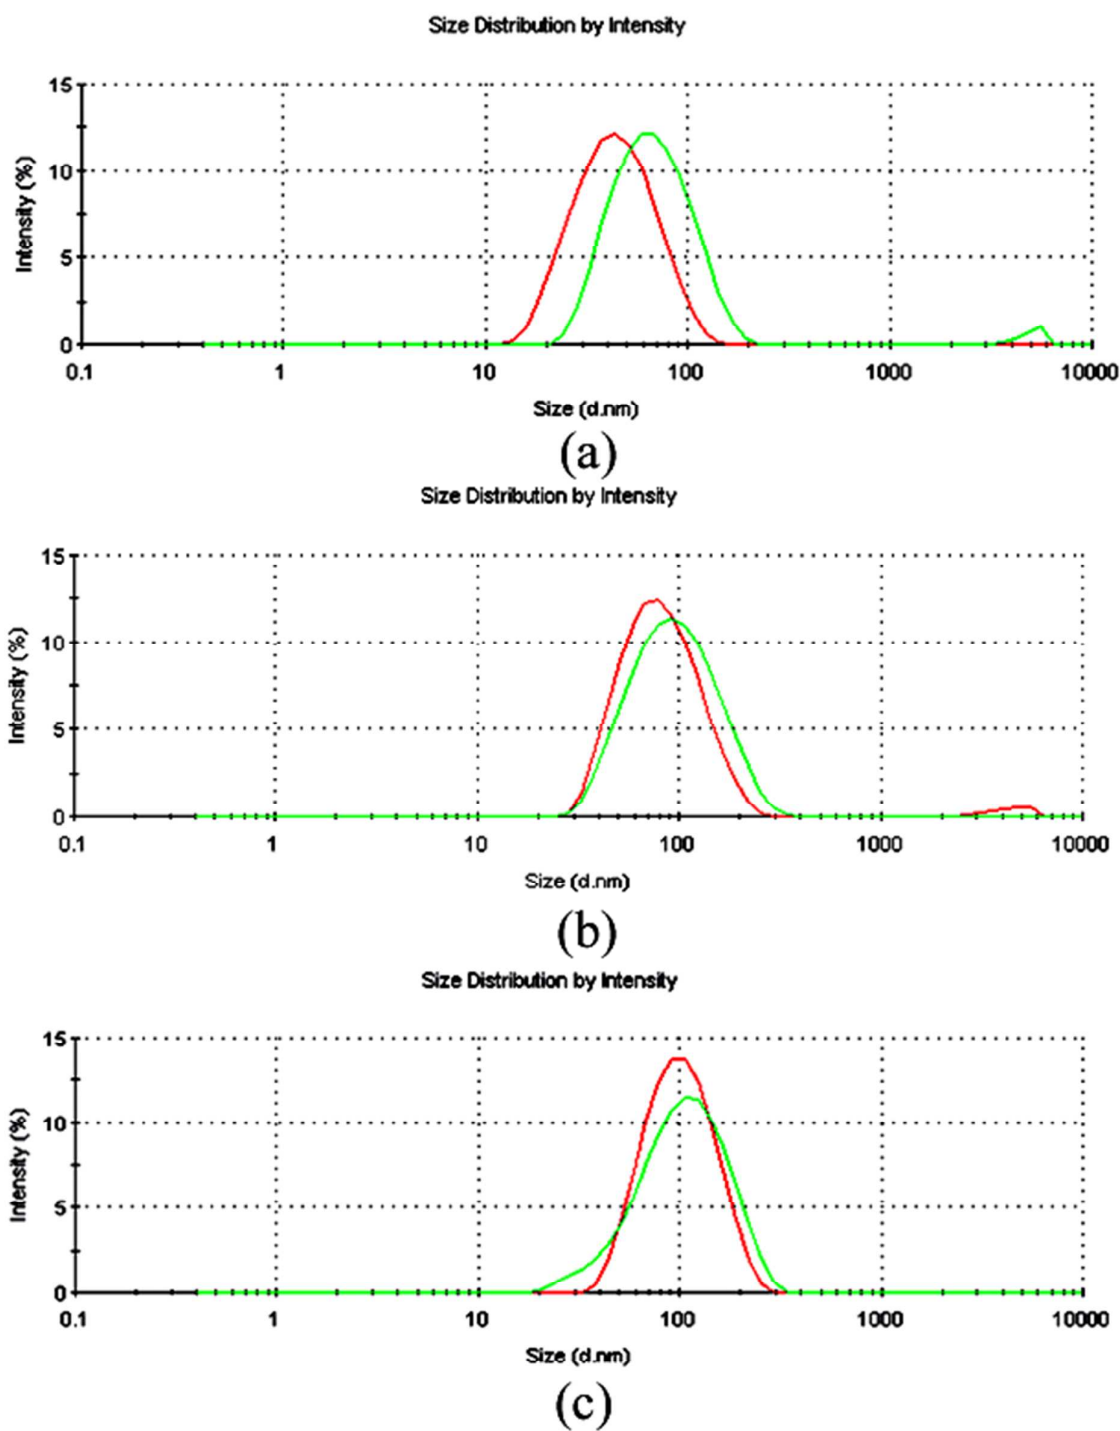

**Figure S1:** DLS curves of the single coated-SPIONs (red curves) and double coated-SPIONs (green curves) for (a) negative, (b) plain, and (c) positive dextran-coated SPIONs dispersed in PBS.

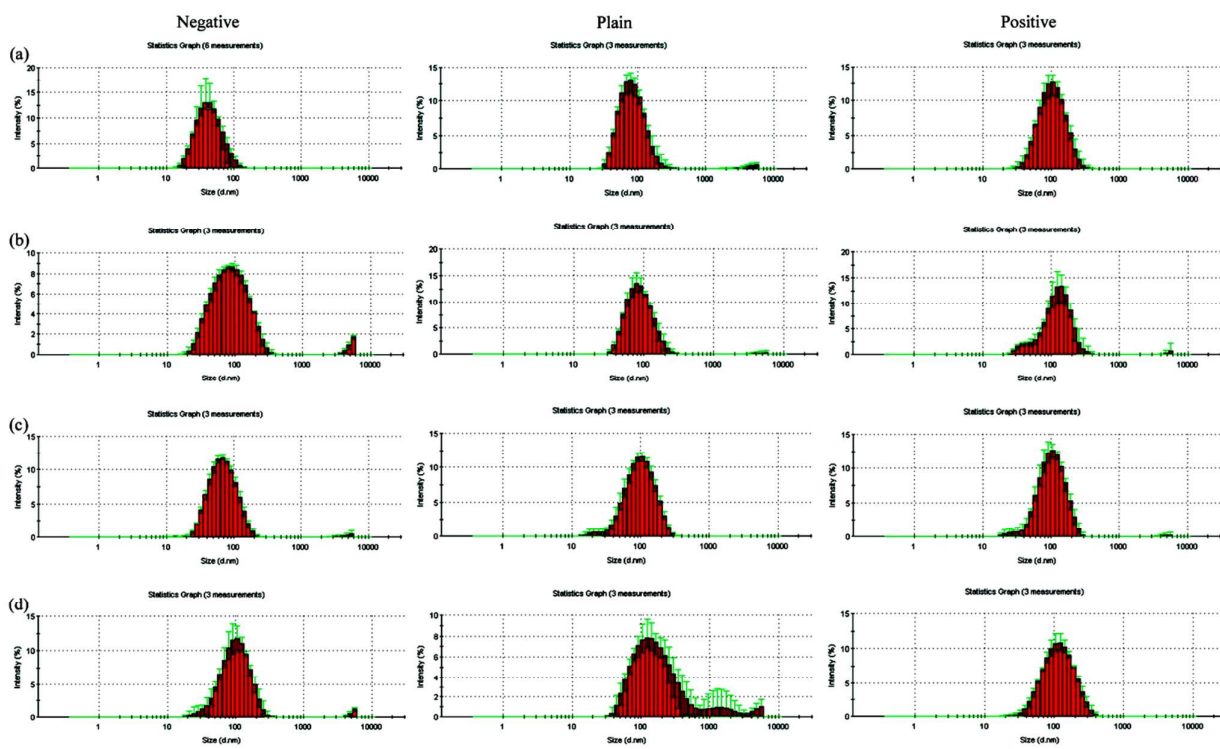

**Figure S2:** CONTIN distribution curves for the single coated-SPIONs dispersed in (a) PBS and (b) FBS. (c) and (d) CONTIN distribution curves for the double coated-SPIONs dispersed in PBS and FBS, respectively.

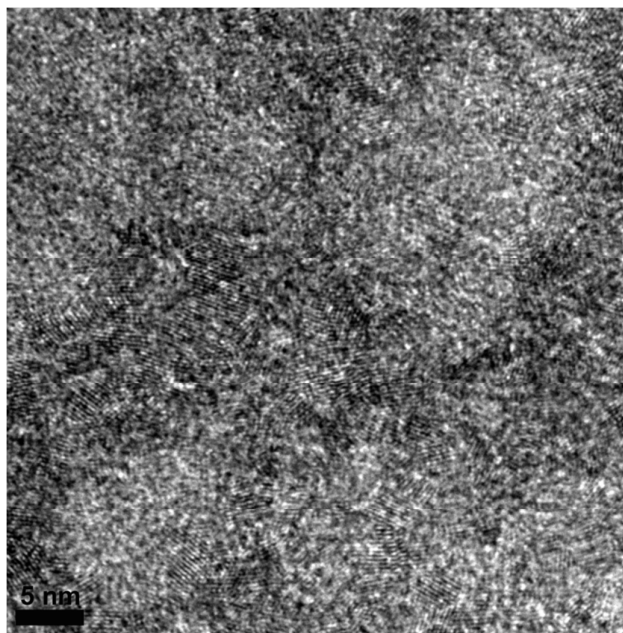

**Figure S3.** High resolution TEM image showing the lattice fringes of the SPION core for single coated COOH-dextran SPIONs.

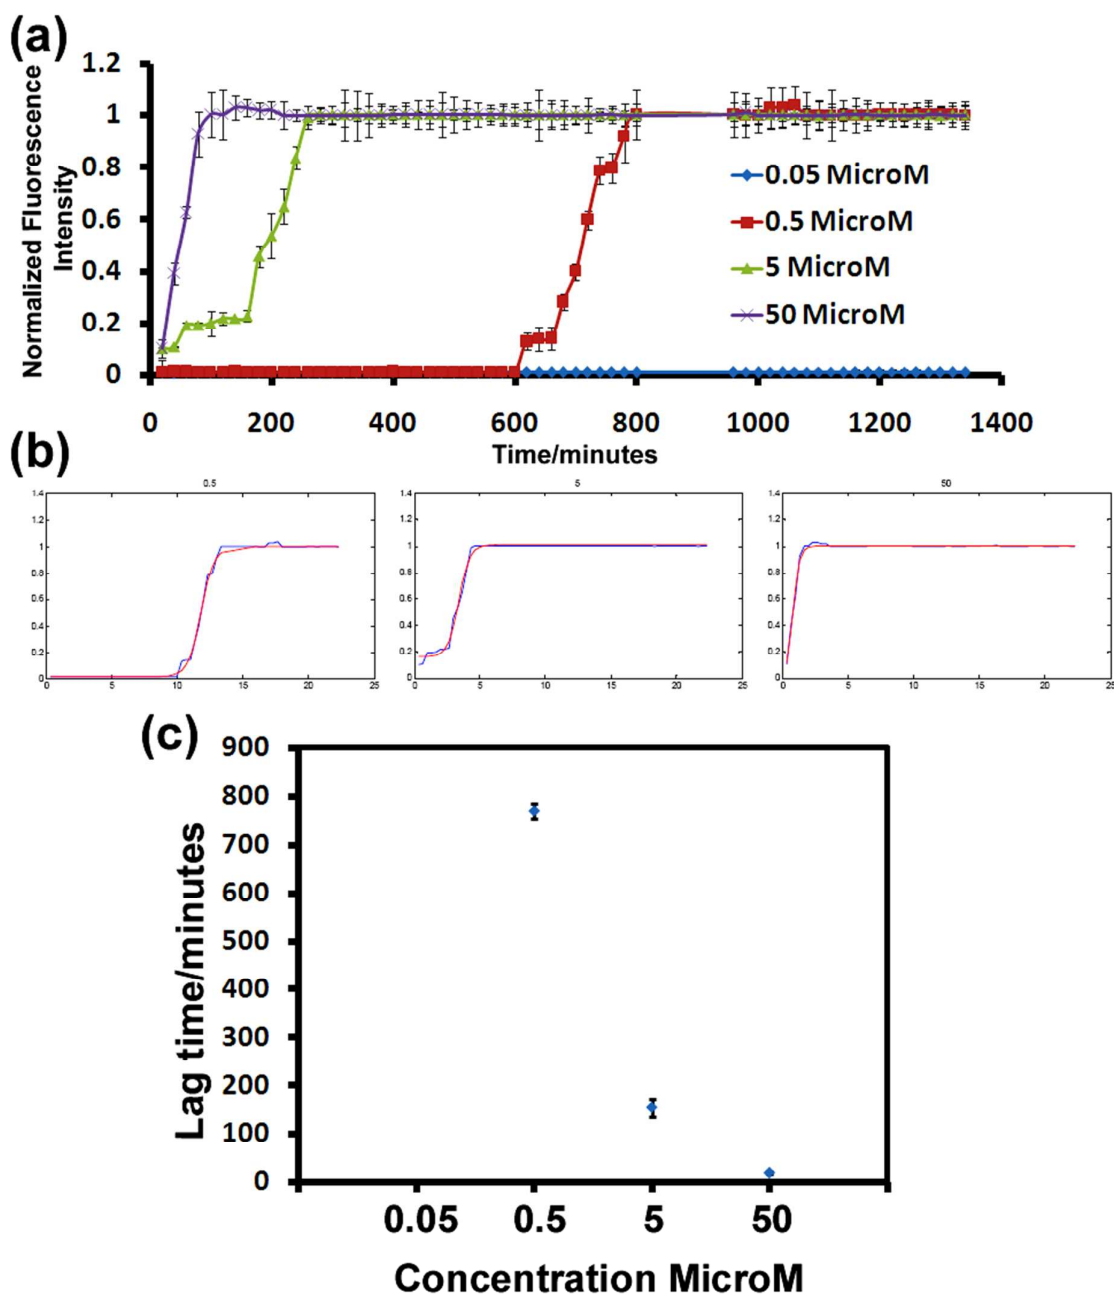

**Figure S4.** (a) Kinetics of A $\beta$  aggregation at various A $\beta$  concentrations monitored using ThT fluorescence; (b) Lines represent the best fit (red line) of equation 2 to the experimental data for A $\beta$  concentrations of 0.5  $\mu$ M, 5  $\mu$ M, and 50  $\mu$ M, respectively (from left to right); (c) Lag times versus concentration of A $\beta$  in solution from the experiments shown in (a).

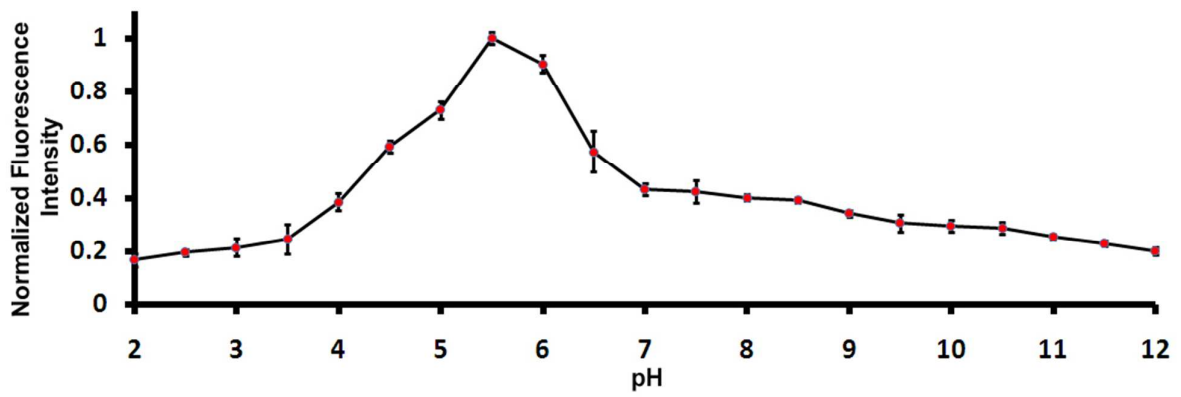

Figure S5. The pH dependence of Aβ oligomerization in solution.

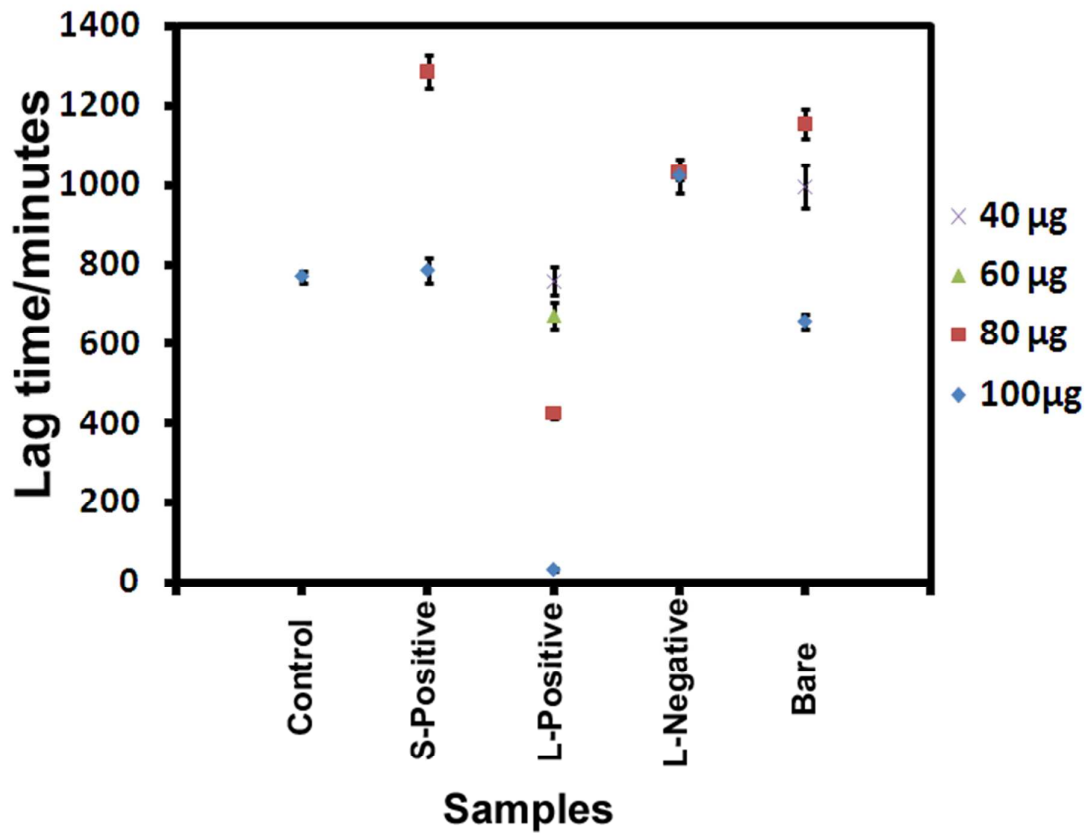

**Figure S6.** Lag times of A $\beta$  fibrillation versus the variously charged single- and double-dextran coated SPIONs as a function of SPION concentration, as determined from the experiments shown in Figure 4 a-d; note that the lag time of plain particles and S-Negative particles are more than 1400 minutes.

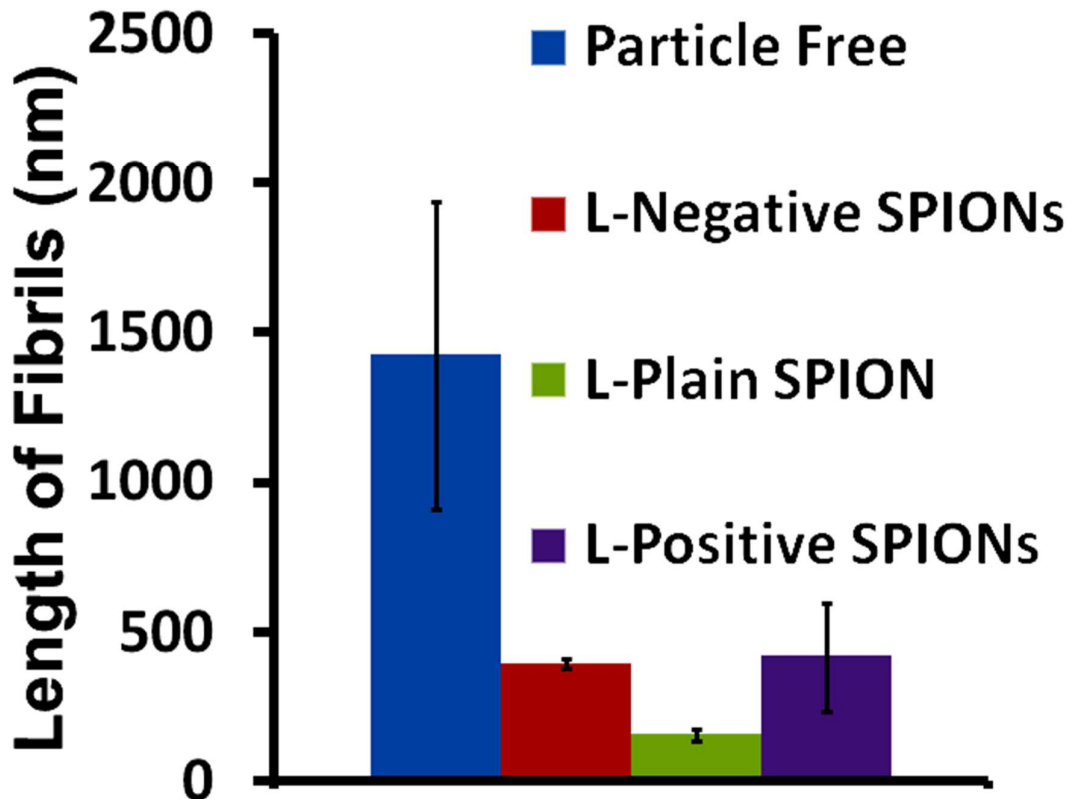

**Figure S7:** Size of A $\beta$  fibrils under various incubation conditions (i.e. free from particles and upon incubation in solution containing 100  $\mu\text{g/ml}$  of the double-dextran coated SPION series (negative, plain and positively dextran coatings), as determined from TEM images (50 fibrils were considered and their sizes were calculated using photoshop software).

**Table S1:** Wavelength and corresponding minimum and maximum ellipticities of CD spectra of A $\beta$  alone, various SPIONs alone, and the mixtures of A $\beta$  and different concentrations of the various SPIONs.

|                                       | Concentration  | $\lambda$<br>(nm) | min/max<br>[ $\theta$ ] | $\lambda$ (nm) | min/max<br>[ $\theta$ ] |
|---------------------------------------|----------------|-------------------|-------------------------|----------------|-------------------------|
| A $\beta$ (After 100 min incubation)  | 0.5 $\mu$ M    | 207               | -2.81                   | 222            | -0.12                   |
| A $\beta$ (After 1340 min incubation) | 0.5 $\mu$ M    | 200               | 3.06                    | 215            | -13.03                  |
| Bare (alone)                          | 100 $\mu$ g/ml | 195               | -0.23                   | 208            | -2.5                    |
| Bare (with A $\beta$ )                | 40 $\mu$ g/ml  | 203               | -31.95                  | 215            | 2.86                    |
|                                       | 60 $\mu$ g/ml  | 205               | -34.87                  | 219            | 0.23                    |
|                                       | 80 $\mu$ g/ml  | 202               | -30.34                  | 217            | 2.95                    |
|                                       | 100 $\mu$ g/ml | 201               | -32.54                  | 215            | 3.01                    |
| S-Negative (alone)                    | 100 $\mu$ g/ml | 195               | -0.13                   | 208            | -2.3                    |
| S-Negative (with A $\beta$ )          | 40 $\mu$ g/ml  | 206               | -12.29                  | 220            | -0.12                   |
|                                       | 60 $\mu$ g/ml  | 206               | -12.32                  | 221            | -2.07                   |
|                                       | 80 $\mu$ g/ml  | 205               | -12.12                  | 220            | -2.21                   |
|                                       | 100 $\mu$ g/ml | 207               | -12.38                  | 220            | -2.48                   |
| S-Plain (alone)                       | 100 $\mu$ g/ml | 193               | 0.16                    | 207            | -2.11                   |
| S-Plain (with A $\beta$ )             | 40 $\mu$ g/ml  | 203               | 11.98                   | 217            | -5.87                   |
|                                       | 60 $\mu$ g/ml  | 206               | -11.98                  | 220            | -0.07                   |
|                                       | 80 $\mu$ g/ml  | 205               | -11.65                  | 220            | -0.17                   |
|                                       | 100 $\mu$ g/ml | 207               | -18.35                  | 222            | -0.11                   |
| S-Positive (alone)                    | 100 $\mu$ g/ml | 196               | -2.92                   | 207            | -0.21                   |
| S-Positive (with A $\beta$ )          | 40 $\mu$ g/ml  | 204               | -18.25                  | 218            | 2.21                    |

|                      |          |     |        |     |       |
|----------------------|----------|-----|--------|-----|-------|
|                      | 60µg/ml  | 204 | -29.83 | 219 | 2.11  |
|                      | 80µg/ml  | 201 | -22.78 | 216 | 3.08  |
|                      | 100µg/ml | 200 | -39.46 | 215 | 3.17  |
| L-Negative (alone)   | 100µg/ml | 194 | -0.28  | 209 | -2.12 |
| L-Negative (with Aβ) | 40µg/ml  | 207 | -10.04 | 220 | -2.01 |
|                      | 60µg/ml  | 207 | -9.07  | 222 | -2.53 |
|                      | 80µg/ml  | 203 | -25.23 | 217 | 2.56  |
|                      | 100µg/ml | 202 | -29.87 | 216 | 2.03  |
| L-Plain (alone)      | 100µg/ml | 193 | +0.21  | 206 | -1.93 |
| L-Plain (with Aβ)    | 40µg/ml  | 207 | -8.07  | 221 | -2.54 |
|                      | 60µg/ml  | 207 | -6.04  | 222 | -2.65 |
|                      | 80µg/ml  | 206 | 7.01   | 221 | -2.81 |
|                      | 100µg/ml | 207 | -5.01  | 222 | -2.85 |
| L-Positive (alone)   | 100µg/ml | 195 | -0.28  | 208 | -1.9  |
| L-Positive (with Aβ) | 40µg/ml  | 200 | -32.98 | 215 | 3.17  |
|                      | 60µg/ml  | 201 | -37.45 | 215 | 3.02  |
|                      | 80µg/ml  | 200 | -43.23 | 215 | 3.12  |
|                      | 100µg/ml | 200 | -48.12 | 215 | 3.78  |
